# Supplementary material for: Adipose-Derived Mesenchymal Stem Cells Alleviate Hypertrophic Scar by Inhibiting Bioactivity and Inducing Apoptosis in Hypertrophic Scar Fibroblasts
Source: MDPI journal article supplement (doi:10.3390/cells11244024), 2022-12-12
Supplement: s1 [file s1]

## Supplementary materials

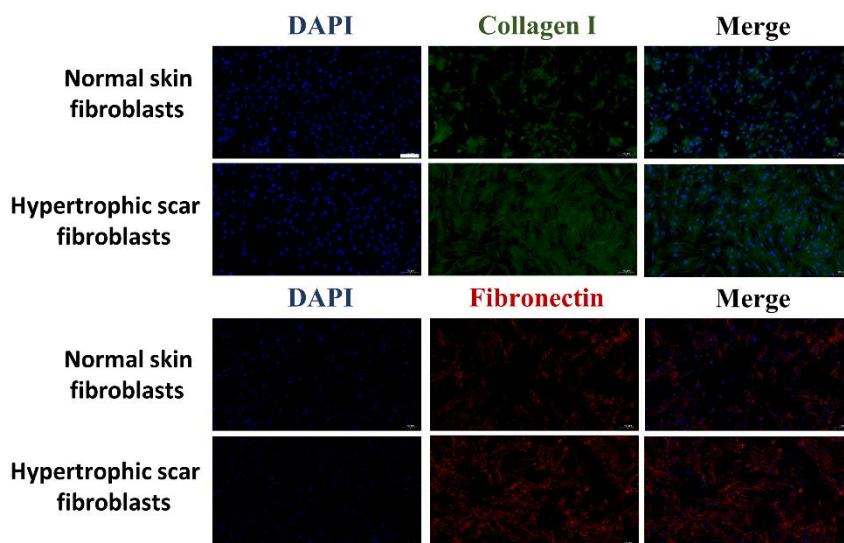

**Figure S1.** Differences between normal skin fibroblasts and hypertrophic scar fibroblasts. Cells were determined by immunofluorescence using antibodies against collagen I and fibronectin.

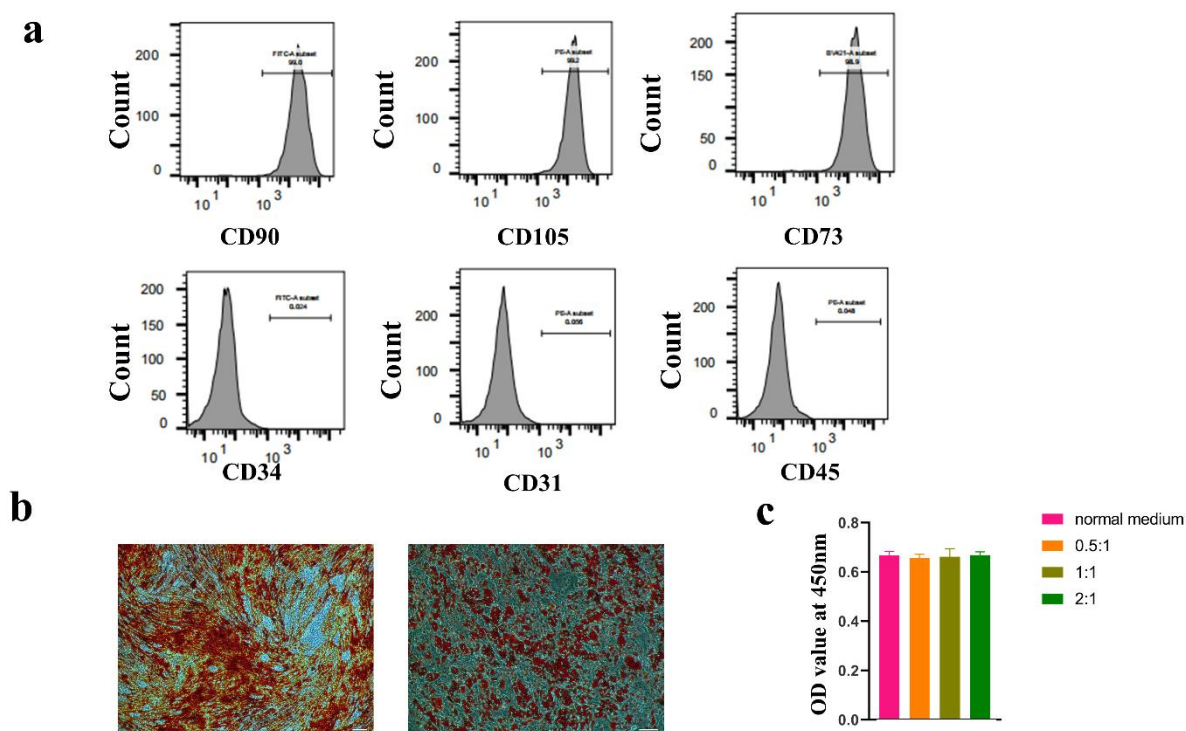

**Figure S2.** Characterization of AD-MSCs after coculturing with HSFs. **a.** Flow cytometric characterization of AD-MSCs. CD105, CD90 and CD73 were positive, while CD34, CD31 and CD45 were negatively expressed, which was not changed. **b.** The AD-MSCs could differentiate into matured adipocytes and osteocytes after coculturing with HSFs. **c.** CCK-8 assay showed that, after coculturing, the proliferation of AD-MSCs had not changed.

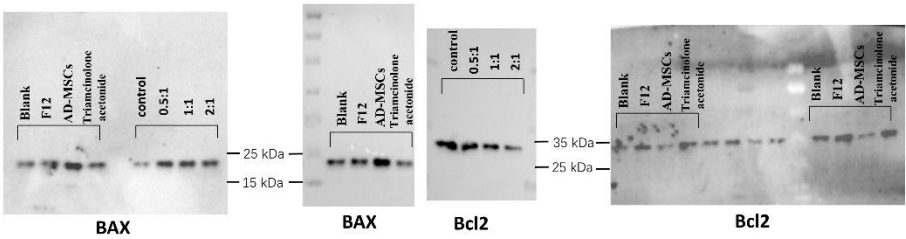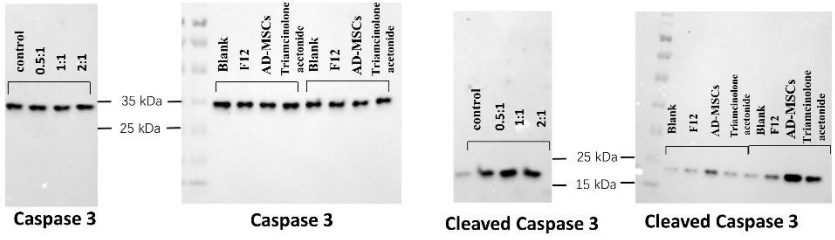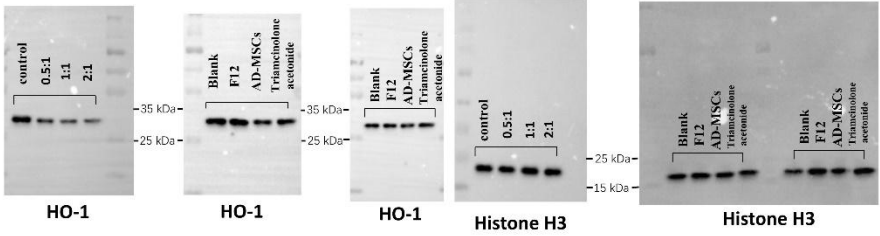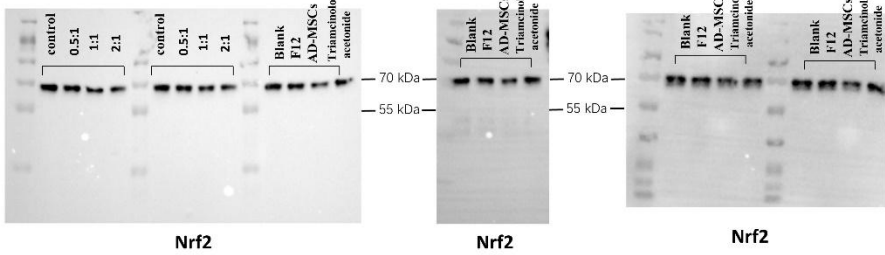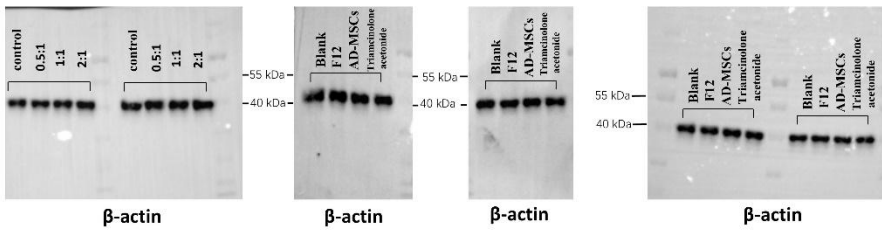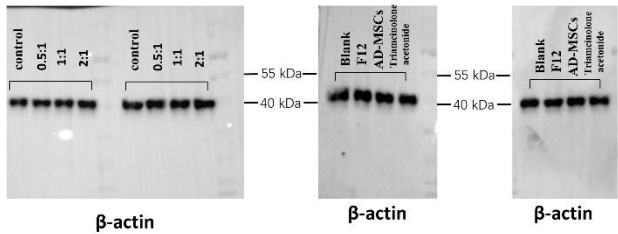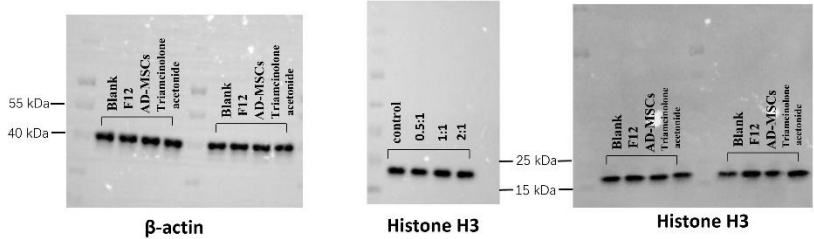

---

**Figure S3.** Full bolts of the cropped bands which were shown in the article.
